# Supplementary material for: Metabolomic Profiling in Combination with Data Association Analysis Provide Insights about Potential Metabolic Regulation Networks among Non-Volatile and Volatile Metabolites in Camellia sinensis cv Baijiguan
Source: MDPI journal article supplement (doi:10.3390/plants11192557), 2022-09-28
Supplement: s1 [file s1]

## Supplementary Figures

### **Metabolomic Profiling in Combination with Data Association Analysis Provide Insights about Potential Metabolic Regulation Networks among Non-Volatile and Volatile Metabolites in *Camellia sinensis* cv *Baijiguan***

**Mingjie Chen <sup>1,2,\*</sup>, Xiangrui Kong <sup>2,\*</sup>, Yi Zhang <sup>3,\*</sup>, Shiya Wang <sup>1</sup>, Huiwen Zhou <sup>1</sup>, Dongsheng Fang <sup>1</sup>, Wenjie Yue <sup>4</sup>, Changsong Chen <sup>2,†</sup>**

<sup>1</sup> College of Life Sciences, Henan Provincial Key Laboratory of Tea Plant Biology, Xinyang Normal University, Xinyang 464000, China

<sup>2</sup> Tea Research Institute, Fujian Academy of Agricultural Sciences, Fuzhou 350012, Fujian, China

<sup>3</sup> School of Life Sciences, Nanchang University, Nanchang 330031, Jiangxi, China

<sup>4</sup> Jinshan College, Fujian Agriculture and Forestry University, Fuzhou, Fujian 350002, China

<sup>†</sup> Correspondence: Changsong Chen ([ccs6536597@163.com](mailto:ccs6536597@163.com))

\*Equal contribution to this work.

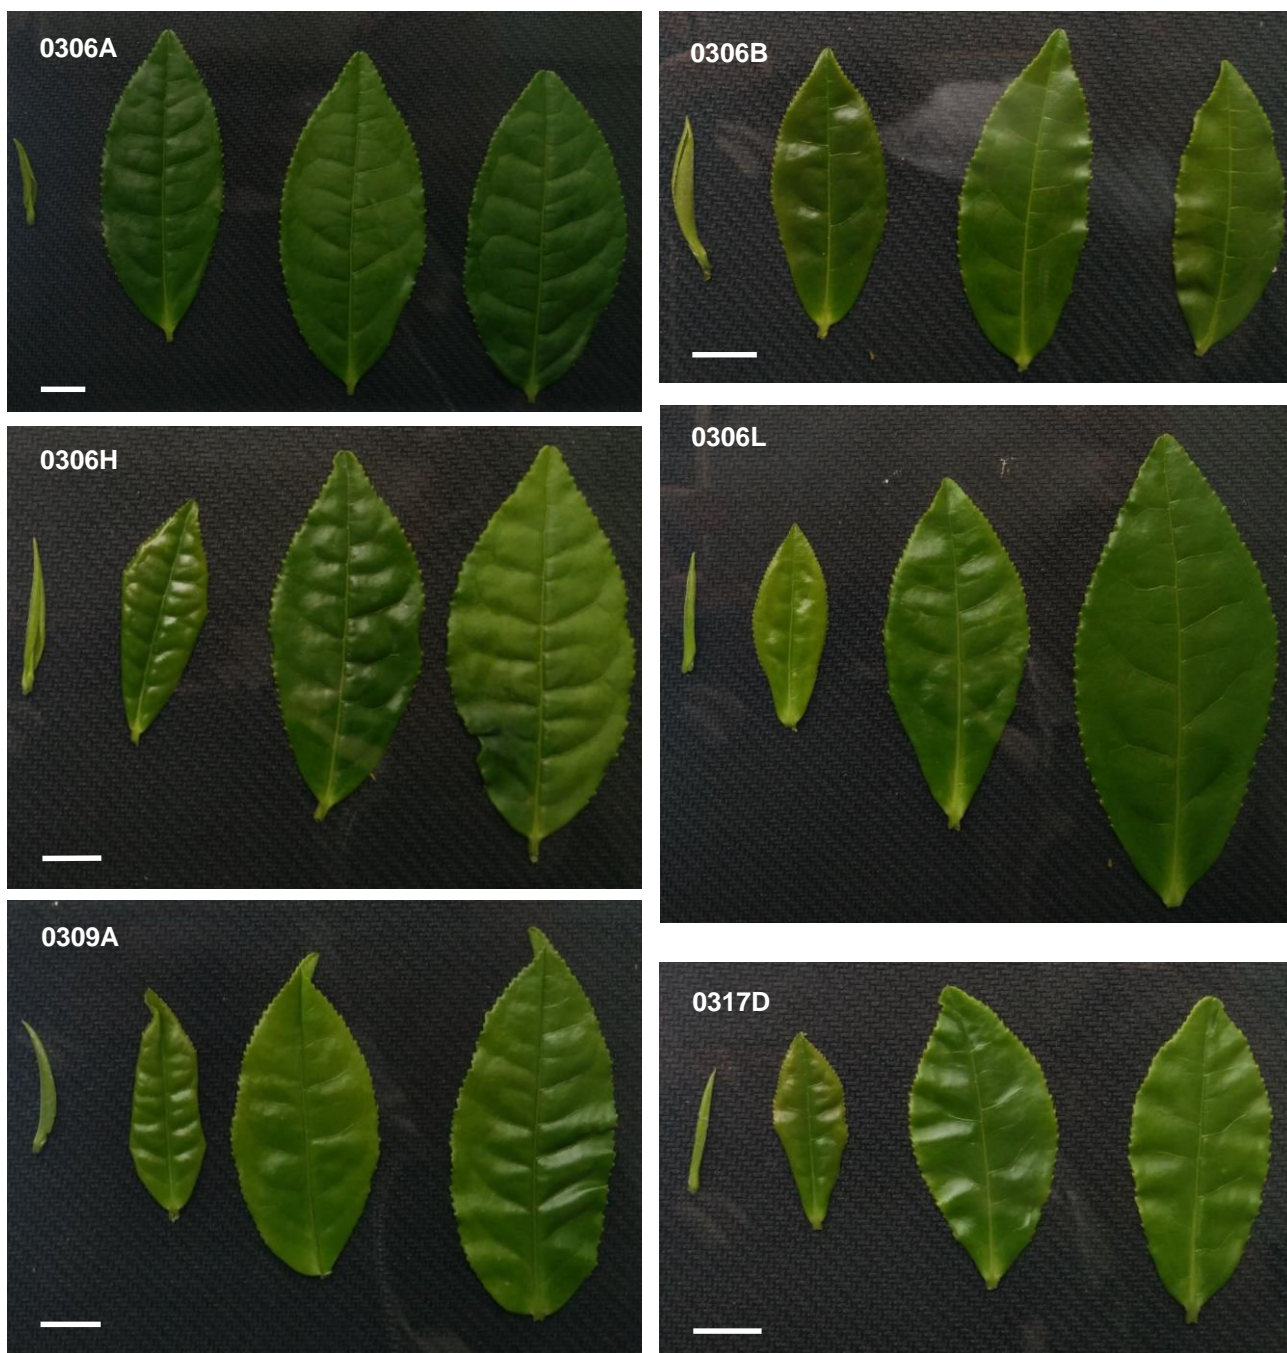

**Figure S1.** One bud and three leaves of the green leaf half-sibs descendent from *Camellia sinensis* cv *Baijiguan*. Bar = 1 cm.



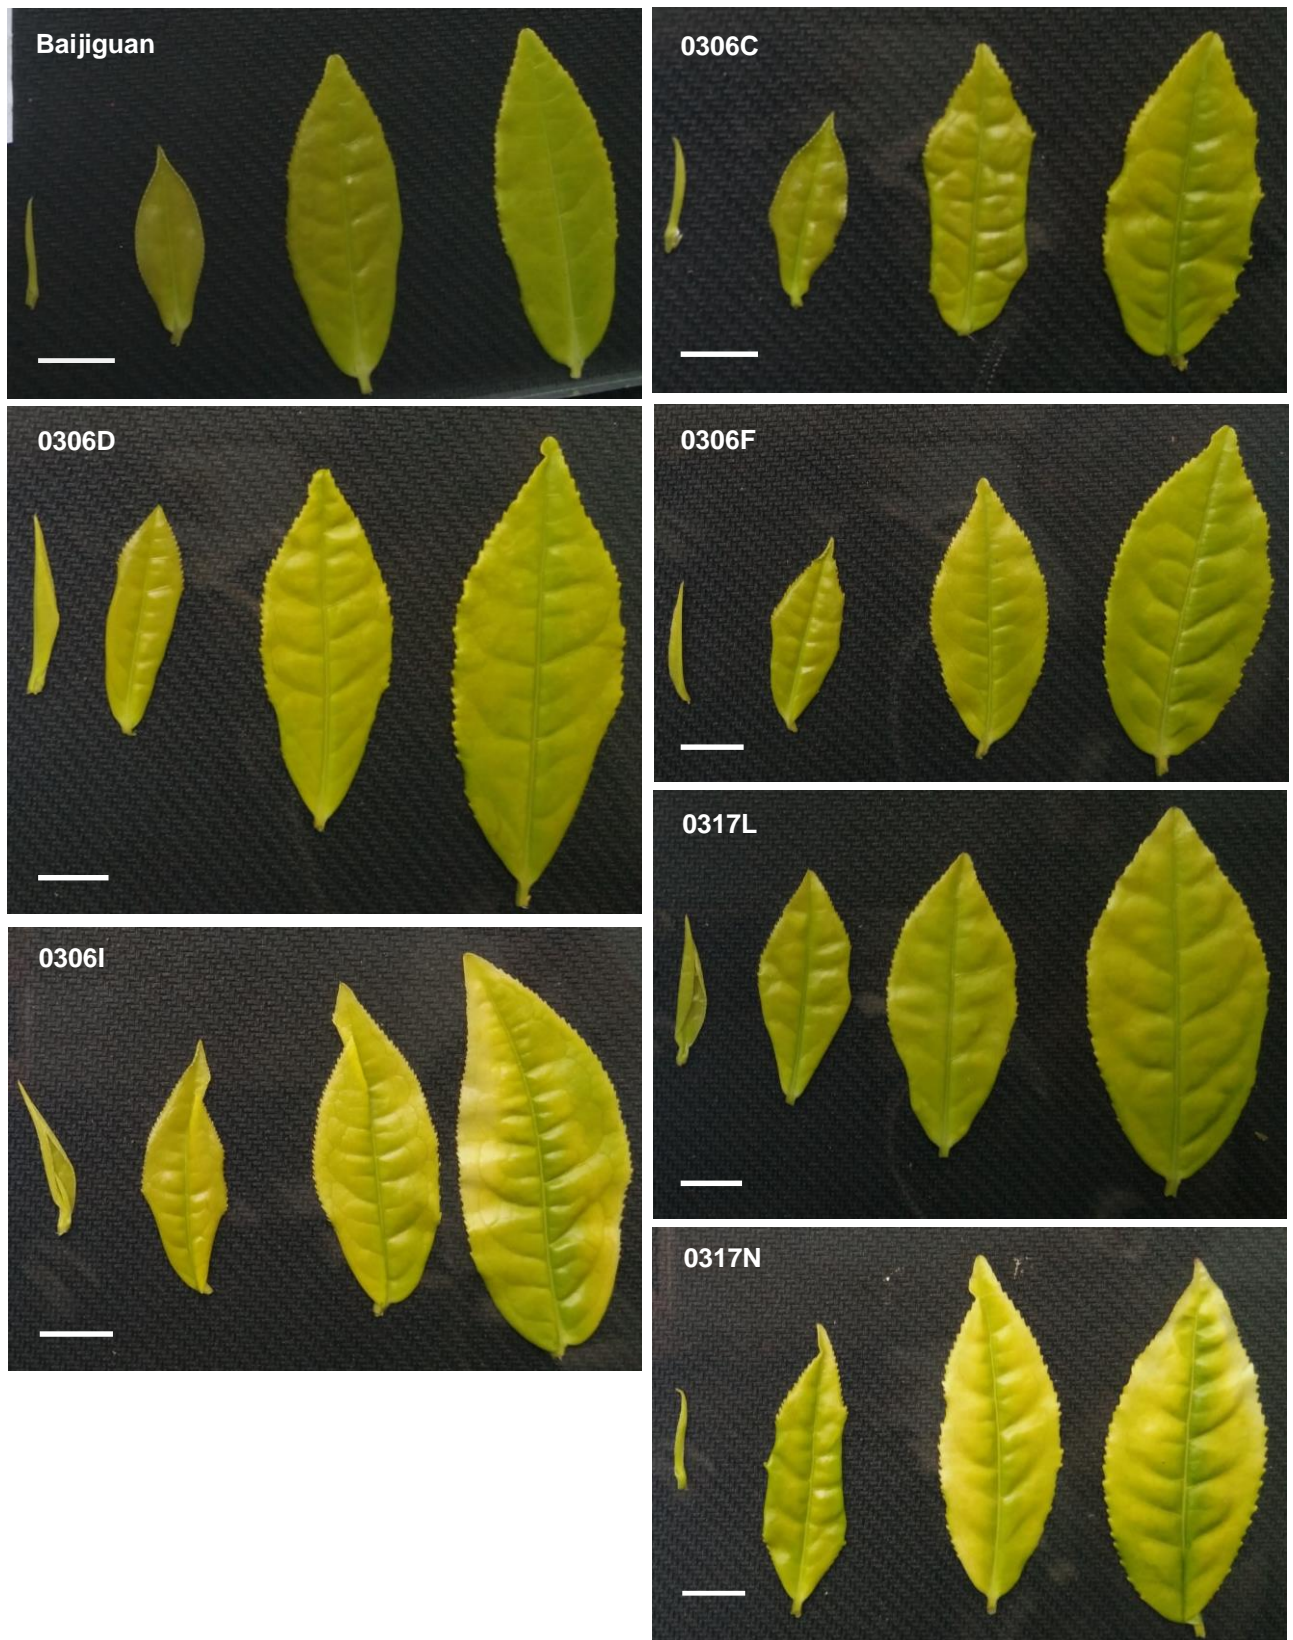

**Figure S2.** One bud and three leaves of the albino half sibs descendent from *Camellia sinensis* cv *Baijiguan*. Bar = 1 cm.

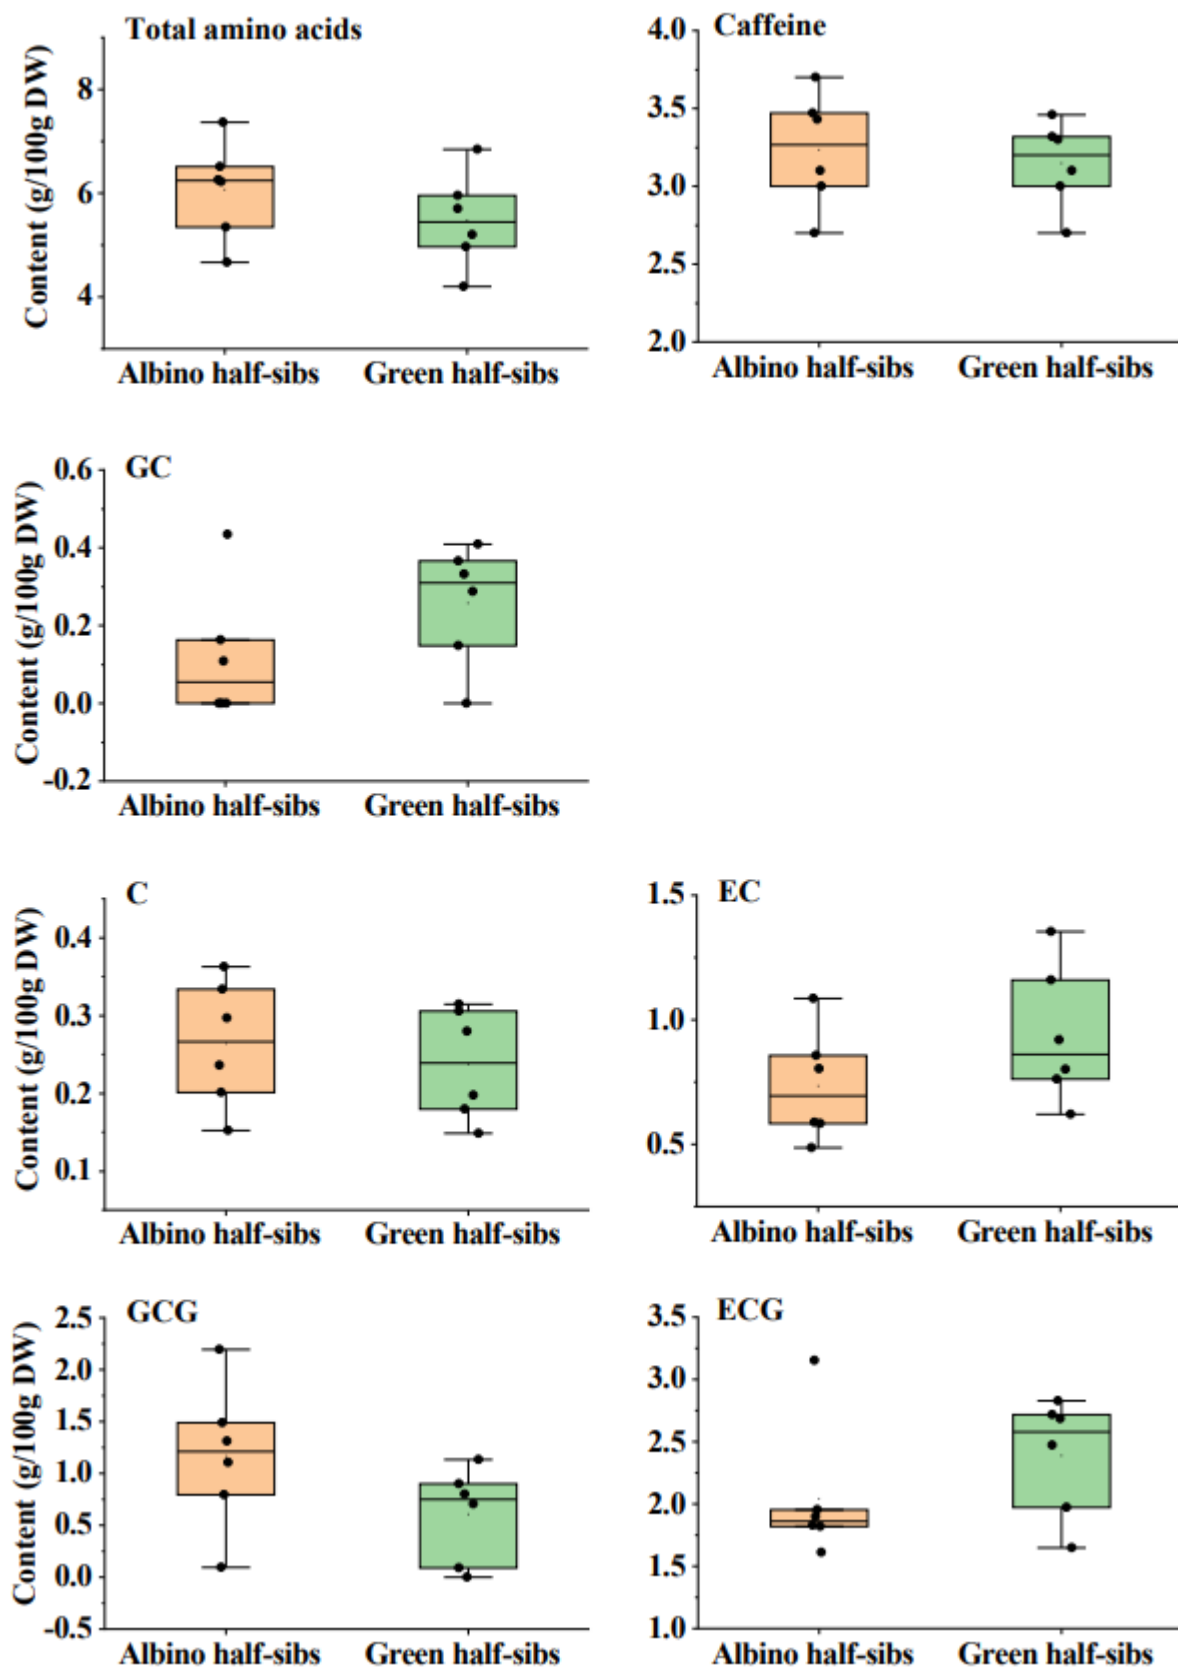

**Figure S3.** The contents of total amino acids, caffeine, and catechins between the albino half-sibs and the green half-sibs

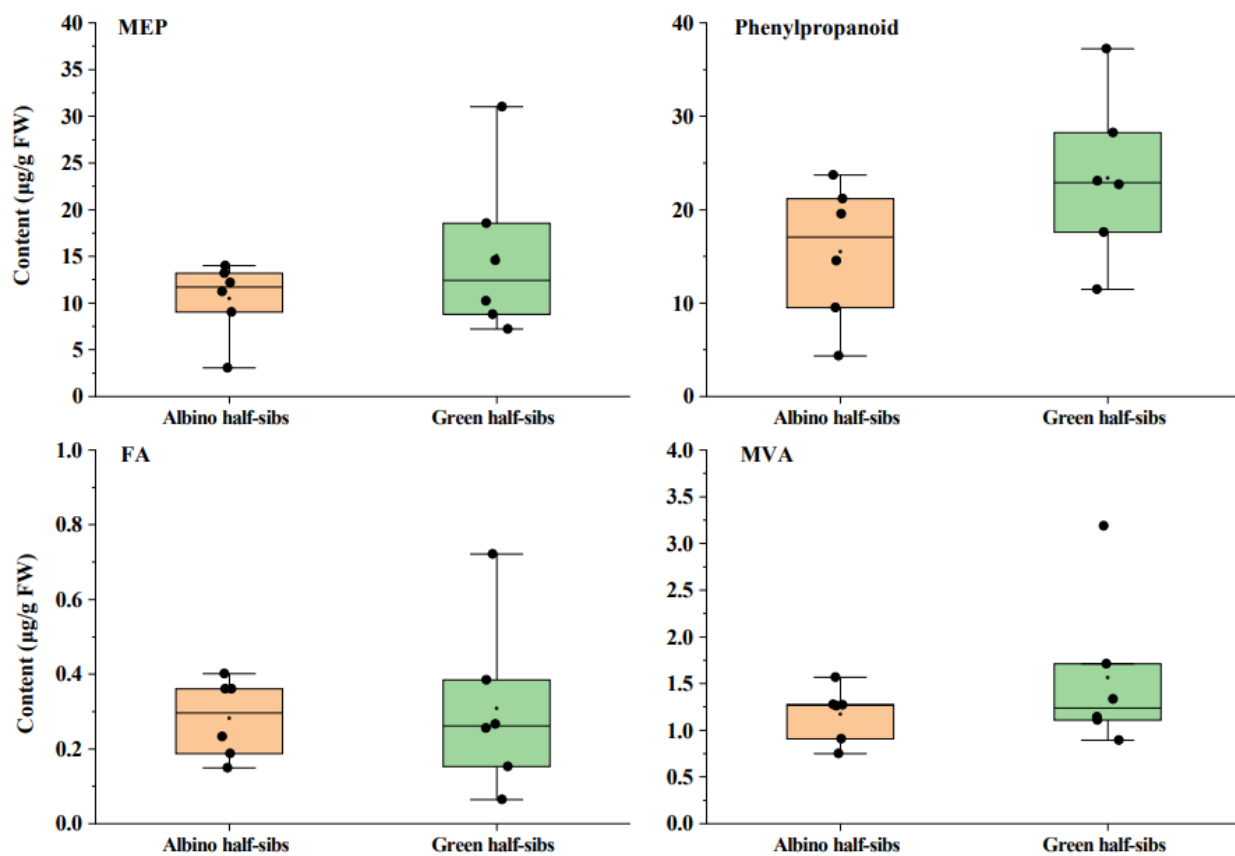

**Figure S4.** The total volatile contents of individual pathway between the albino half-sibs and the green half-sibs

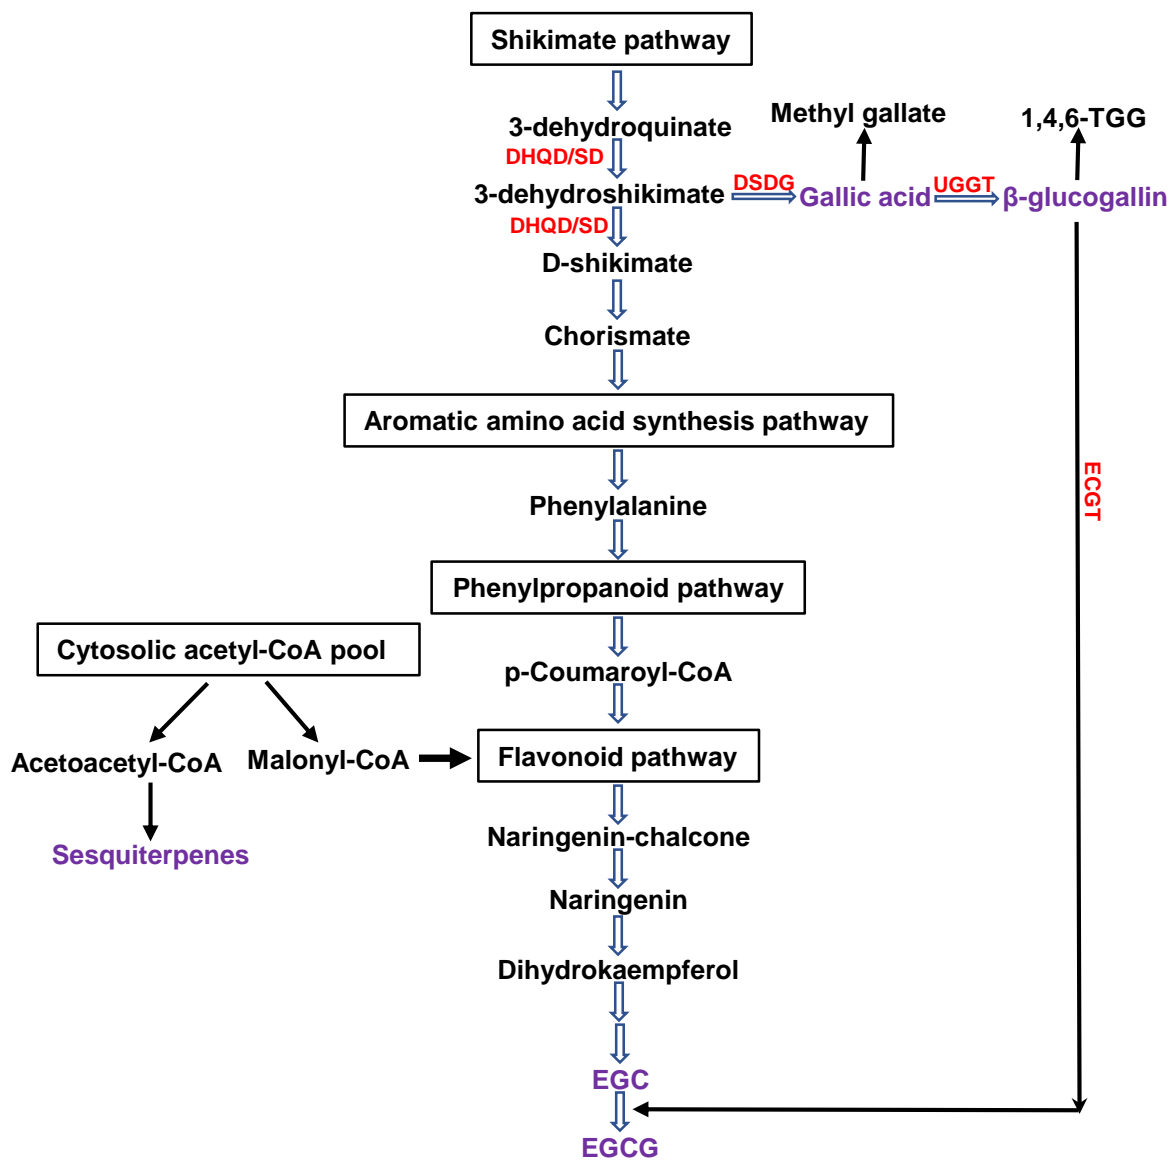

**Figure S5.** A simplified diagram of catechin synthesis pathway from shikimate. DHQD/SD, 3-dehydroquininate dehydratase/shikimate dehydrogenase; DSDG, dehydroshikimate dehydro-genase; UGGT, UDP-glucose:galloyl-1-O-β-D-glucosyl-transferase; ECGT, epicatechin:1-O-galloyl-β-D-glucose O-galloyltransferase; EGC, (-)-epicatechin gallate; EGCG, (-)-epigallocatechin gallate;

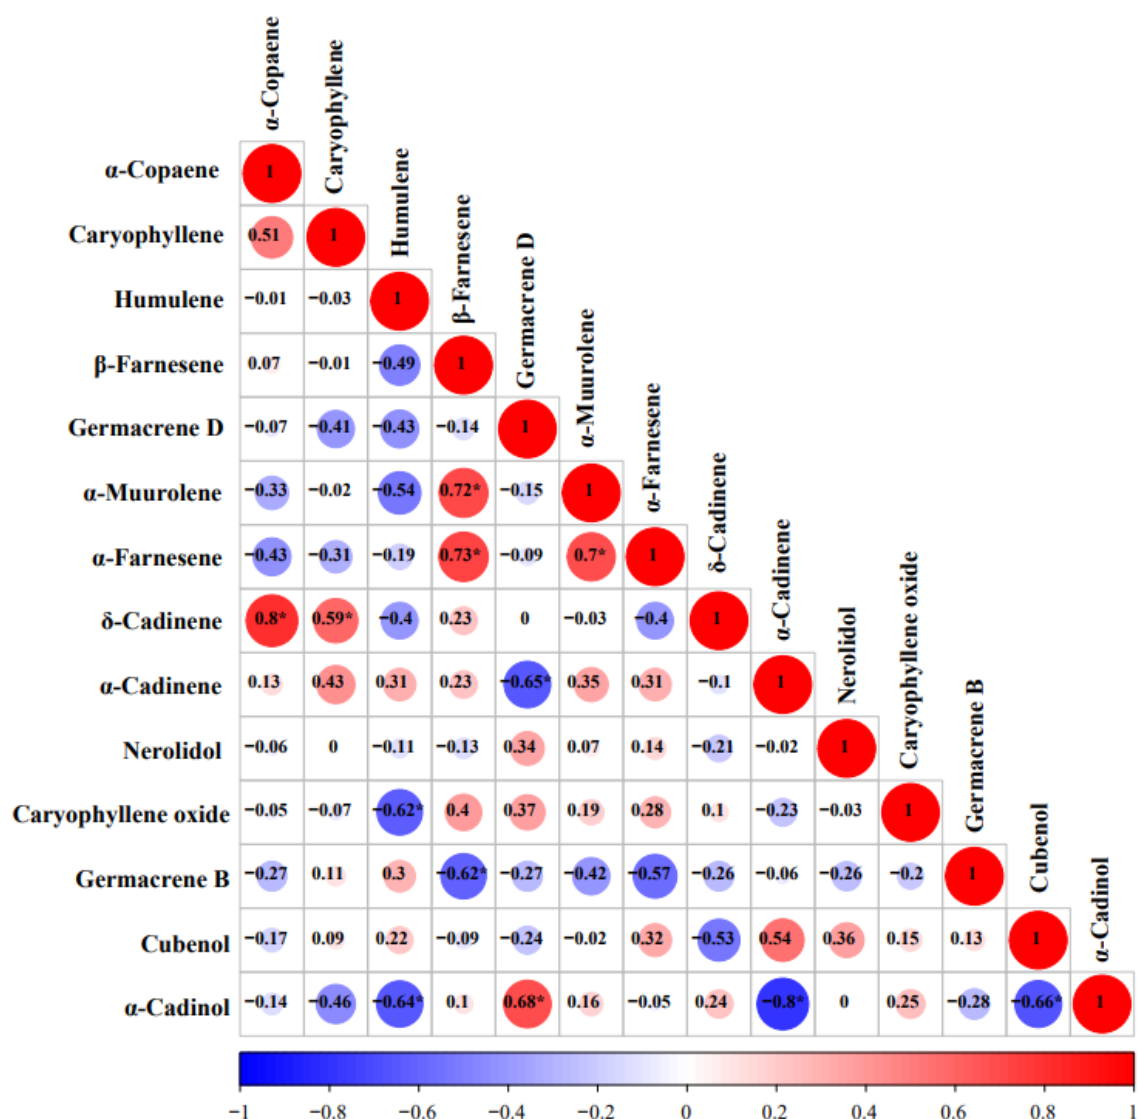

Figure S6. The correlations of volatiles derived from MVA pathway

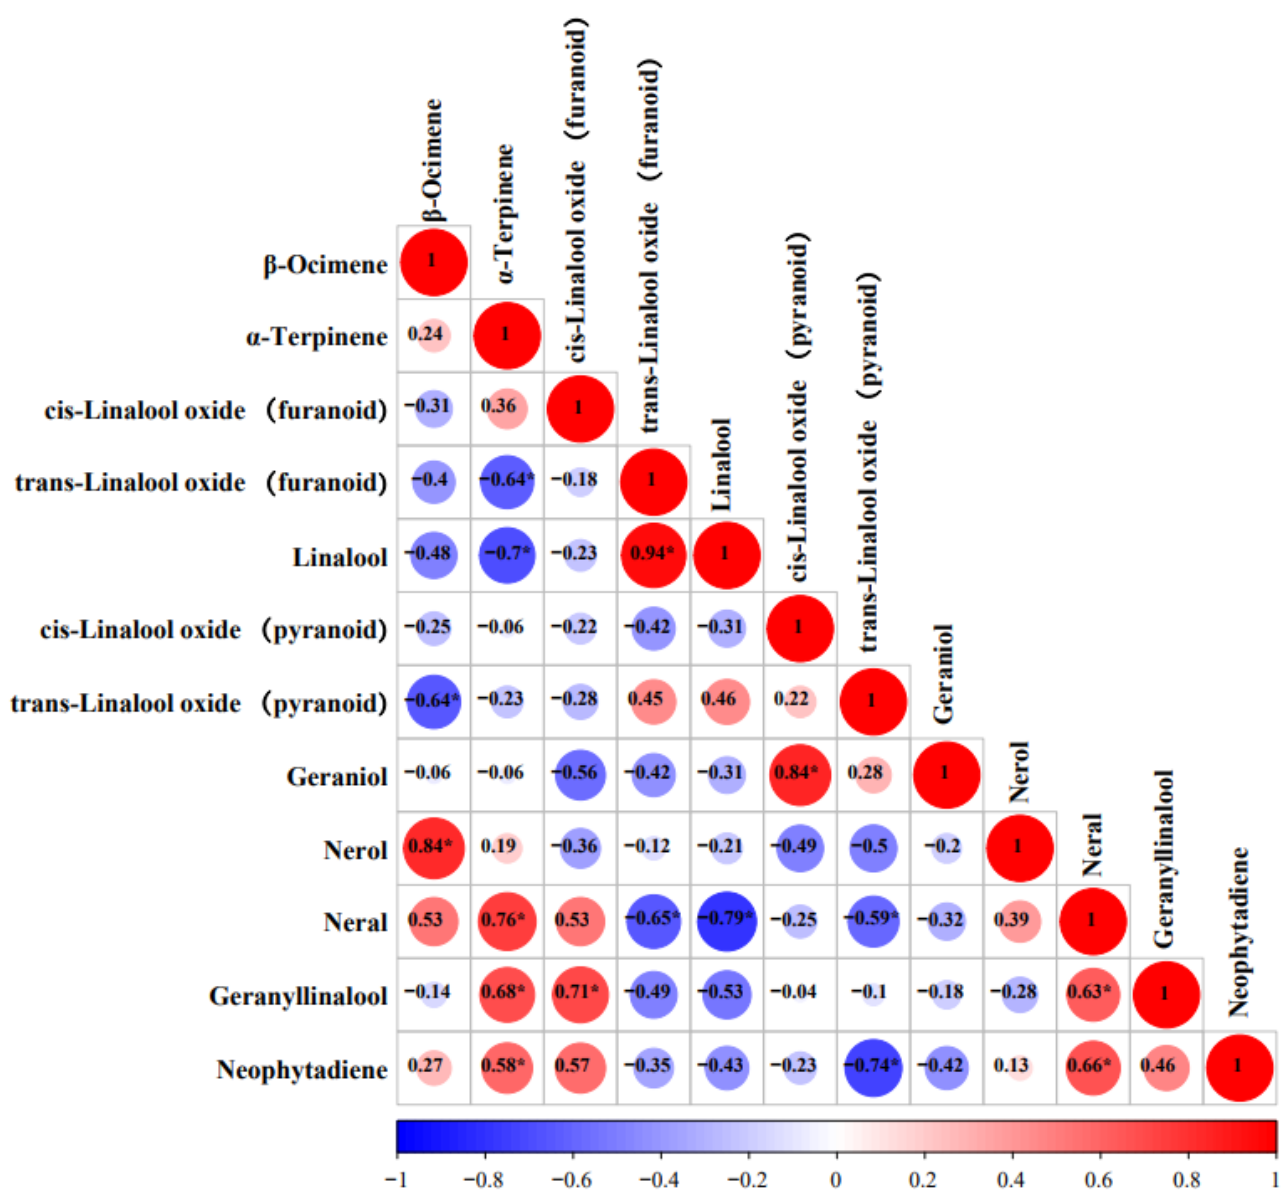

**Figure S7.** The correlations of volatiles derived from MEP pathway



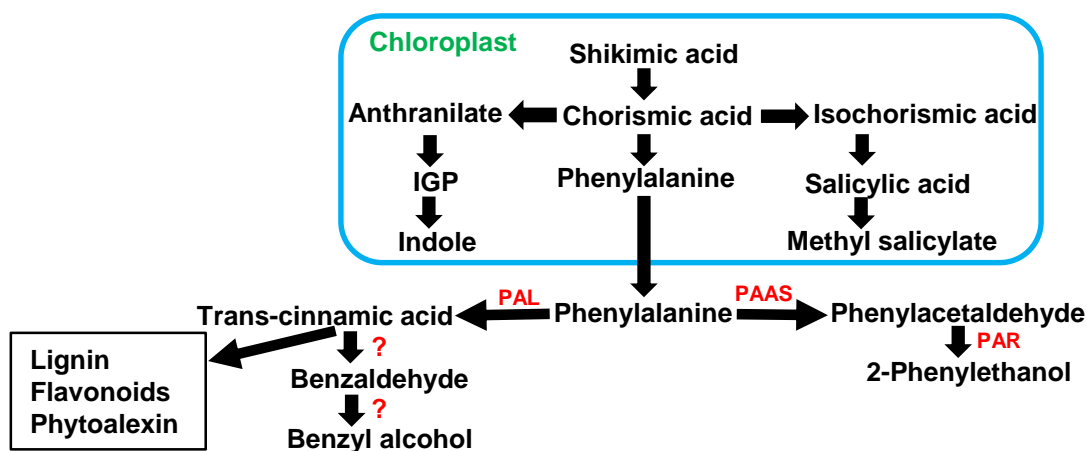

**Figure S8.** A simplified diagram presentation of shikimate–phenylpropanoid–benzenoid volatile synthesis pathways. PALs, phenylalanine ammonia lyases; PAAS, phenylacetaldehyde synthase; PAR, phenylacetaldehyde reductase
