# Supplementary material for: Metabolomic Profiling in Combination with Data Association Analysis Provide Insights about Potential Metabolic Regulation Networks among Non-Volatile and Volatile Metabolites in Camellia sinensis cv Baijiguan
Source: MDPI journal article supplement (doi:10.3390/plants11192557), 2022-09-28
Supplement: s1 [file s1]

**Supplementary Data S2.** The volatile contents ( $\mu\text{g g}^{-1}$  fresh tea weight) from the albino half-sibs and the green half-sibs of *Camellia sinensis* cv *Baijiguan*

| Pathway         | RT    | Compound                        | Contents ( $\mu\text{g g}^{-1}$ fresh tea weight) |            |           |            |            |           |            |            |            |            |            |            |
|-----------------|-------|---------------------------------|---------------------------------------------------|------------|-----------|------------|------------|-----------|------------|------------|------------|------------|------------|------------|
| y               | (min) |                                 | 0306C                                             | 0306D      | 0306F     | 0306I      | 0317L      | 0317N     | 0306A      | 0306B      | 0306H      | 0306L      | 0309A      | 0317D      |
| Phenylpropanoid | 10.15 | Benzyl alcohol                  | 2.82±0.16                                         | 4.46±0.59  | 2.62±0.48 | 5.94±0.25  | 7.29±0.62  | 0.63±0.08 | 3.74±0.20  | 2.93±0.20  | 12.87±0.88 | 4.00±0.31  | 15.03±0.50 | 4.12±0.34  |
|                 | 12.57 | Phenylethyl Alcohol             | 12.80±1.2                                         | 14.09±1.02 | 2.19±0.45 | 3.54±0.30  | 11.92±0.71 | 2.00±0.07 | 5.64±0.46  | 8.82±0.47  | 7.25±0.39  | 15.67±1.37 | 17.53±0.22 | 16.49±0.22 |
|                 | 15.04 | Methyl salicylate               | 3.82±0.27                                         | 2.33±0.15  | 4.44±0.37 | 4.77±0.28  | 4.37±0.19  | 1.63±0.11 | 1.91±0.12  | 5.31±0.54  | 2.70±0.12  | 2.93±0.18  | 4.51±0.08  | 7.47±0.65  |
|                 | 18.84 | Indole                          | 0.08±0.00                                         | 0.17±0.00  | 0.15±0.02 | 0.16±0.02  | 0.14±0.01  | 0.08±0.00 | 0.12±0.00  | 0.21±0.01  | 0.16±0.01  | 0.11±0.00  | 0.17±0.01  | 0.11±0.02  |
|                 | 22.38 | Coumarin                        | 0.05±0.00                                         | 0.13±0.00  | 0.12±0.01 | 0.12±0.02  | nd         | nd        | 0.07±0.00  | 0.32±0.04  | 0.08±0.01  | nd         | nd         | 0.06±0.01  |
|                 |       | subtotal                        | 19.56±1.5                                         | 21.18±1.55 | 9.53±0.88 | 14.53±0.76 | 23.72±1.41 | 4.35±0.11 | 11.48±0.61 | 17.58±0.50 | 23.06±0.59 | 22.72±1.61 | 37.24±0.56 | 28.26±1.17 |
|                 |       |                                 | 4                                                 |            |           |            |            |           |            |            |            |            |            |            |
| MEP             | 8.82  | (E)- $\beta$ -Ocimene           | 0.54±0.02                                         | 0.76±0.07  | 0.82±0.13 | 0.69±0.07  | 0.50±0.02  | 0.45±0.16 | 0.48±0.09  | 2.64±0.32  | 1.57±0.12  | 0.55±0.02  | 0.58±0.25  | 1.21±0.16  |
|                 | 9.61  | $\alpha$ -Terpinene             | 0.00±0.00                                         | 0.00±0.00  | 0.00±0.00 | 0.00±0.00  | 0.00±0.00  | 0.15±0.03 | 0.00±0.00  | 0.00±0.00  | 0.00±0.00  | 0.00±0.00  | 0.09±0.01  | 0.00±0.00  |
|                 | 10.41 | cis-Linalool oxide (furanoid)   | 2.79±0.31                                         | 3.65±0.08  | 5.77±1.49 | 5.93±0.35  | 3.39±0.28  | 1.30±0.09 | 2.72±0.17  | 1.01±0.51  | 3.09±0.25  | 2.26±0.24  | 3.77±0.47  | 4.92±0.50  |
|                 | 11.30 | trans-Linalool oxide (furanoid) | 2.08±0.12                                         | 1.23±0.17  | 1.85±0.17 | 1.79±0.06  | 1.74±0.09  | 0.20±0.02 | 1.59±0.10  | 0.97±0.07  | 2.37±0.18  | 0.91±0.07  | 0.96±0.06  | 5.62±0.18  |
|                 | 11.79 | Linalool                        | 3.84±0.16                                         | 2.08±0.22  | 3.79±0.34 | 3.99±0.16  | 3.13±0.12  | 0.28±0.03 | 3.53±0.24  | 1.80±0.02  | 5.17±0.46  | 1.73±0.12  | 2.14±0.07  | 11.66±0.64 |
|                 | 14.36 | cis-Linalool oxide (pyranoid)   | nd                                                | nd         | nd        | nd         | 0.05±0.00  | nd        | nd         | nd         | 0.09±0.01  | nd         | 0.13±0.02  | nd         |
|                 | 14.50 | trans-Linalool oxide (pyranoid) | 0.73±0.03                                         | 0.43±0.06  | 0.00±0.00 | 0.52±0.02  | 0.60±0.02  | 0.07±0.00 | 0.55±0.03  | 0.00±0.00  | 1.19±0.11  | 0.28±0.03  | 0.61±0.03  | 2.23±0.04  |
|                 | 16.76 | Geraniol                        | 1.60±0.17                                         | 0.33±0.07  | 0.00±0.00 | 0.38±0.04  | 1.28±0.09  | 0.22±0.03 | 0.83±0.08  | 1.34±0.24  | 4.55±0.23  | 1.00±0.15  | 5.73±0.73  | 4.26±0.45  |
|                 | 17.13 | Nerol                           | 0.34±0.02                                         | 0.09±0.01  | 0.16±0.02 | 0.23±0.02  | 0.17±0.04  | 0.11±0.02 | 0.28±0.05  | 0.65±0.09  | 0.11±0.01  | 0.20±0.03  | 0.06±0.00  | 0.64±0.09  |
|                 | 17.51 | Neral                           | 0.12±0.00                                         | 0.24±0.01  | 0.23±0.02 | 0.22±0.02  | 0.17±0.01  | 0.13±0.01 | 0.15±0.00  | 0.23±0.01  | 0.15±0.00  | 0.14±0.00  | 0.23±0.01  | 0.12±0.01  |
|                 | 34.92 | Geranylinalool                  | 0.05±0.00                                         | 0.08±0.01  | 0.10±0.02 | 0.11±0.01  | 0.06±0.01  | 0.05±0.01 | 0.06±0.01  | 0.00±0.00  | 0.15±0.02  | 0.09±0.04  | 0.10±0.03  | 0.07±0.01  |

|               |       |                                    |           |           |            |            |            |           |            |           |            |           |            |            |
|---------------|-------|------------------------------------|-----------|-----------|------------|------------|------------|-----------|------------|-----------|------------|-----------|------------|------------|
|               | 30.88 | Neophytadiene                      | 0.09±0.05 | 0.13±0.06 | 0.49±0.31  | 0.15±0.05  | 0.14±0.08  | 0.11±0.03 | 0.06±0.01  | 0.14±0.05 | 0.09±0.05  | 0.08±0.03 | 0.17±0.04  | 0.26±0.10  |
|               |       | Subtotal                           | 12.18±0.4 | 9.02±0.36 | 13.21±1.69 | 14.01±0.48 | 11.24±0.50 | 3.06±0.11 | 10.24±0.56 | 8.79±0.63 | 18.53±0.63 | 7.24±0.60 | 14.57±0.40 | 31.00±1.49 |
|               |       | 4                                  |           |           |            |            |            |           |            |           |            |           |            |            |
| MVA           | 20.60 | $\alpha$ -Copaene                  | 0.04±0.00 | 0.06±0.00 | 0.00±0.00  | 0.04±0.01  | 0.09±0.01  | 0.03±0.00 | 0.05±0.00  | 0.39±0.06 | 0.06±0.00  | 0.04±0.00 | 0.06±0.01  | 0.13±0.01  |
|               | 21.66 | Caryophyllene                      | nd        | nd        | nd         | nd         | 0.08±0.01  | nd        | 0.04±0.01  | 0.26±0.04 | 0.04±0.00  | nd        | 0.07±0.01  | nd         |
|               | 22.44 | Humulene                           | 0.29±0.02 | 0.32±0.04 | 0.00±0.00  | 0.34±0.01  | 0.35±0.01  | 0.27±0.02 | 0.33±0.01  | 0.69±0.06 | 0.07±0.00  | 0.32±0.01 | 0.39±0.02  | 0.10±0.02  |
|               | 22.60 | $\beta$ -Farnesene                 | 0.06±0.00 | 0.09±0.00 | 0.08±0.01  | 0.10±0.00  | 0.07±0.00  | 0.04±0.00 | 0.08±0.00  | 0.20±0.01 | 0.14±0.01  | 0.04±0.00 | 0.06±0.00  | 0.09±0.01  |
|               | 23.68 | Germacrene D                       | nd        | 0.04±0.00 | 0.07±0.01  | 0.04±0.00  | 0.04±0.00  | 0.03±0.00 | nd         | nd        | nd         | nd        | 0.04±0.00  | 0.08±0.01  |
|               | 23.43 | $\alpha$ -Murolene                 | nd        | 0.04±0.00 | 0.05±0.01  | nd         | nd         | nd        | 0.04±0.00  | nd        | 0.06±0.00  | nd        | nd         | nd         |
|               | 24.25 | $\alpha$ -Farnesene                | 0.16±0.00 | 0.26±0.01 | 0.29±0.03  | 0.28±0.02  | 0.24±0.02  | 0.17±0.00 | 0.23±0.01  | 0.39±0.00 | 0.35±0.01  | 0.17±0.01 | 0.19±0.01  | 0.19±0.02  |
|               | 24.48 | $\delta$ -Cadinene                 | 0.03±0.00 | 0.04±0.01 | 0.05±0.01  | 0.03±0.00  | 0.06±0.01  | nd        | 0.05±0.01  | 0.42±0.07 | 0.05±0.00  | nd        | 0.04±0.00  | 0.11±0.01  |
|               | 24.56 | $\alpha$ -Cadinene                 | 0.04±0.00 | 0.11±0.01 | nd         | nd         | 0.10±0.01  | 0.06±0.00 | 0.09±0.00  | 0.23±0.01 | 0.13±0.00  | 0.06±0.00 | 0.10±0.00  | nd         |
|               | 24.93 | (E)-Nerolidol                      | 0.00±0.00 | 0.07±0.01 | 0.08±0.01  | 0.07±0.00  | 0.10±0.01  | 0.03±0.00 | 0.06±0.00  | 0.11±0.01 | 0.06±0.01  | 0.07±0.00 | 0.08±0.01  | 0.08±0.00  |
|               | 25.11 | Caryophyllene<br>oxide             | nd        | nd        | 0.06±0.00  | 0.06±0.00  | nd         | 0.04±0.00 | nd         | 0.10±0.01 | 0.07±0.01  | nd        | 0.07±0.01  | 0.06±0.01  |
|               | 25.55 | Germacrene B                       | 0.16±0.04 | 0.04±0.00 | 0.09±0.01  | 0.07±0.01  | 0.08±0.02  | 0.03±0.00 | 0.05±0.00  | 0.23±0.02 | nd         | 0.11±0.02 | 0.53±0.12  | nd         |
|               | 26.49 | Cubebol                            | nd        | nd        | nd         | nd         | 0.08±0.00  | 0.06±0.00 | nd         | nd        | 0.09±0.01  | 0.08±0.00 | 0.09±0.01  | nd         |
|               | 27.05 | $\alpha$ -Cadinol                  | 0.12±0.07 | 0.19±0.08 | 0.81±0.39  | 0.23±0.05  | nd         | nd        | 0.10±0.03  | 0.16±0.04 | nd         | nd        | nd         | 0.49±0.15  |
|               |       | Subtotal                           | 0.91±0.08 | 1.27±0.12 | 1.57±0.40  | 1.26±0.08  | 1.28±0.04  | 0.75±0.02 | 1.14±0.05  | 3.19±0.26 | 1.11±0.04  | 0.89±0.01 | 1.71±0.14  | 1.33±0.18  |
| FA-derivative | 20.44 | cis-3-hexenyl<br>hexanoate         | 0.04±0.00 | 0.06±0.00 | 0.07±0.01  | 0.05±0.00  | 0.05±0.00  | 0.03±0.00 | 0.04±0.00  | 0.11±0.00 | 0.09±0.00  | 0.04±0.00 | 0.06±0.00  | 0.00±0.00  |
|               | 21.05 | cis-Jasmone                        | 0.10±0.00 | 0.23±0.00 | 0.23±0.03  | 0.21±0.03  | 0.19±0.01  | 0.12±0.00 | 0.14±0.00  | 0.50±0.03 | 0.30±0.02  | 0.11±0.00 | 0.21±0.01  | 0.00±0.00  |
|               | 33.41 | Hexadecanoic<br>acid, methyl ester | 0.04±0.01 | 0.07±0.01 | 0.10±0.03  | 0.10±0.00  | nd         | nd        | 0.07±0.01  | 0.12±0.01 | nd         | nd        | nd         | 0.06±0.00  |
|               |       | subtotal                           | 0.19±0.01 | 0.36±0.02 | 0.40±0.05  | 0.36±0.04  | 0.23±0.01  | 0.15±0.01 | 0.26±0.01  | 0.72±0.05 | 0.39±0.02  | 0.15±0.00 | 0.27±0.02  | 0.06±0.00  |

Data were expressed as mean  $\pm$  standard error (n = 4). nd, not detected.
