# Supplementary material for: Metabolomic Profiling in Combination with Data Association Analysis Provide Insights about Potential Metabolic Regulation Networks among Non-Volatile and Volatile Metabolites in Camellia sinensis cv Baijiguan
Source: MDPI journal article supplement (doi:10.3390/plants11192557), 2022-09-28
Supplement: s1 [file s1]

**Supplementary Data S1.** The nonvolatile contents of the albino half-sibs and the green half-sibs of *Camellia sinensis* cv *Baijiguan* (%).

|                  | Germplasm | Total polyphenols | Amino Acids | Caffeine  | GA        | GC        | EGC       | C         | EC        | EGCG      | GCG       | ECG       | CG        | Non-ester catechins | Ester-catechins | Total catechins |
|------------------|-----------|-------------------|-------------|-----------|-----------|-----------|-----------|-----------|-----------|-----------|-----------|-----------|-----------|---------------------|-----------------|-----------------|
| Albino half-sibs | 0306C     | 20.10±1.60        | 5.35±0.37   | 3.35±0.17 | 0.00±0.00 | 0.00±0.00 | 1.54±0.52 | 0.30±0.08 | 0.80±0.05 | 5.16±1.26 | 1.31±0.11 | 1.82±0.45 | 0.00±0.00 | 2.54±0.46           | 7.41±1.33       | 10.64±1.59      |
|                  | 0306D     | 17.90±1.83        | 4.67±0.59   | 3.27±0.15 | 0.05±0.01 | 0.43±0.00 | 1.32±0.32 | 0.15±0.03 | 0.58±0.13 | 6.44±0.97 | 1.11±0.01 | 1.61±0.33 | 0.33±0.01 | 2.27±0.31           | 8.77±0.95       | 11.05±0.95      |
|                  | 0306F     | 16.99±1.14        | 6.51±0.10   | 3.81±0.01 | 0.06±0.01 | 0.16±0.01 | 1.51±0.29 | 0.20±0.04 | 1.09±0.24 | 6.74±0.56 | 0.10±0.01 | 3.15±0.67 | 0.00±0.00 | 2.85±0.11           | 9.92±1.07       | 12.79±1.16      |
|                  | 0306I     | 20.47±2.03        | 6.22±0.62   | 3.90±0.13 | 0.00±0.00 | 0.00±0.00 | 0.80±0.28 | 0.33±0.09 | 0.59±0.05 | 6.09±1.01 | 1.49±0.11 | 1.90±0.32 | 0.00±0.00 | 1.61±0.27           | 8.48±0.89       | 9.90±1.59       |
|                  | 0317L     | 20.56±0.80        | 6.26±0.19   | 3.47±0.23 | 0.00±0.00 | 0.00±0.00 | 1.06±0.41 | 0.24±0.03 | 0.49±0.04 | 6.92±0.78 | 2.19±0.20 | 1.83±0.13 | 0.00±0.00 | 1.71±0.35           | 9.48±0.35       | 10.95±0.60      |
|                  | 0317N     | 15.95±0.45        | 7.36±0.18   | 3.43±0.25 | 0.00±0.00 | 0.11±0.02 | 1.33±0.24 | 0.36±0.06 | 0.86±0.26 | 5.72±0.95 | 0.79±0.54 | 1.95±0.49 | 0.00±0.00 | 2.46±0.24           | 8.2±1.06        | 10.94±1.80      |
| Green half-sibs  | 0306A     | 21.32±1.37        | 5.96±0.43   | 3.46±0.10 | 0.09±0.01 | 0.15±0.01 | 1.85±0.57 | 0.31±0.08 | 1.35±0.30 | 7.85±1.41 | 0.90±0.60 | 2.72±0.48 | 0.00±0.00 | 3.57±0.79           | 11.17±1.35      | 14.74±2.14      |
|                  | 0306B     | 20.72±0.23        | 3.27±0.40   | 3.53±0.10 | 0.00±0.00 | 0.33±0.01 | 1.39±0.21 | 0.18±0.01 | 0.76±0.02 | 7.04±0.62 | 0.80±0.02 | 2.83±0.07 | 0.09±0.00 | 2.32±0.06           | 10.17±0.03      | 11.65±0.08      |
|                  | 0306H     | 19.98±1.62        | 5.70±0.39   | 3.32±0.04 | 0.00±0.00 | 0.37±0.04 | 1.61±0.23 | 0.31±0.08 | 1.16±0.50 | 7.84±0.86 | 0.09±0.01 | 2.47±0.67 | 0.00±0.00 | 3.09±0.92           | 10.34±1.56      | 15.16±2.78      |
|                  | 0306L     | 24.28±1.19        | 6.84±0.50   | 3.25±0.08 | 0.00±0.00 | 0.41±0.01 | 1.28±0.16 | 0.15±0.07 | 0.62±0.07 | 7.30±1.05 | 1.13±0.29 | 1.65±0.18 | 0.30±0.03 | 2.26±0.11           | 9.95±0.71       | 12.20±0.93      |
|                  | 0309A     | 21.40±1.76        | 4.97±0.16   | 3.00±0.05 | 0.08±0.01 | 0.00±0.00 | 2.00±0.36 | 0.28±0.07 | 0.92±0.11 | 8.16±0.70 | 0.00±0.00 | 2.68±0.07 | 0.00±0.00 | 3.2±0.40            | 10.84±0.76      | 14.04±1.13      |
|                  | 0317D     | 22.47±1.32        | 4.97±0.13   | 3.07±0.18 | 0.05±0.01 | 0.29±0.02 | 1.77±0.19 | 0.20±0.04 | 0.80±0.06 | 7.88±0.58 | 0.70±0.02 | 1.97±0.21 | 0.16±0.01 | 2.91±0.18           | 10.28±0.45      | 13.19±0.67      |

Data were presented as average ± standard error (n=4). GA: gallic acid; GC: (+)-gallic catechin; EGC: (-)-epigallocatechin; C: (+)-catechin; EC: (-)-epicatechin; EGCG: (-)-epigallocatechin gallate; GCG: gallic catechin gallate; ECG: (-)-epicatechin gallate; CG: catechin gallate.
